# Supplementary figures and images for: What is rehabilitation? An empirical investigation leading to an evidence-based description
Source: PubMed Central journal article supplement — Clin Rehabil. 2020 Feb 10;34(5):571–83. doi: 10.1177/0269215520905112 (PMC7350200; doi:10.1177/0269215520905112), 2020-02-10

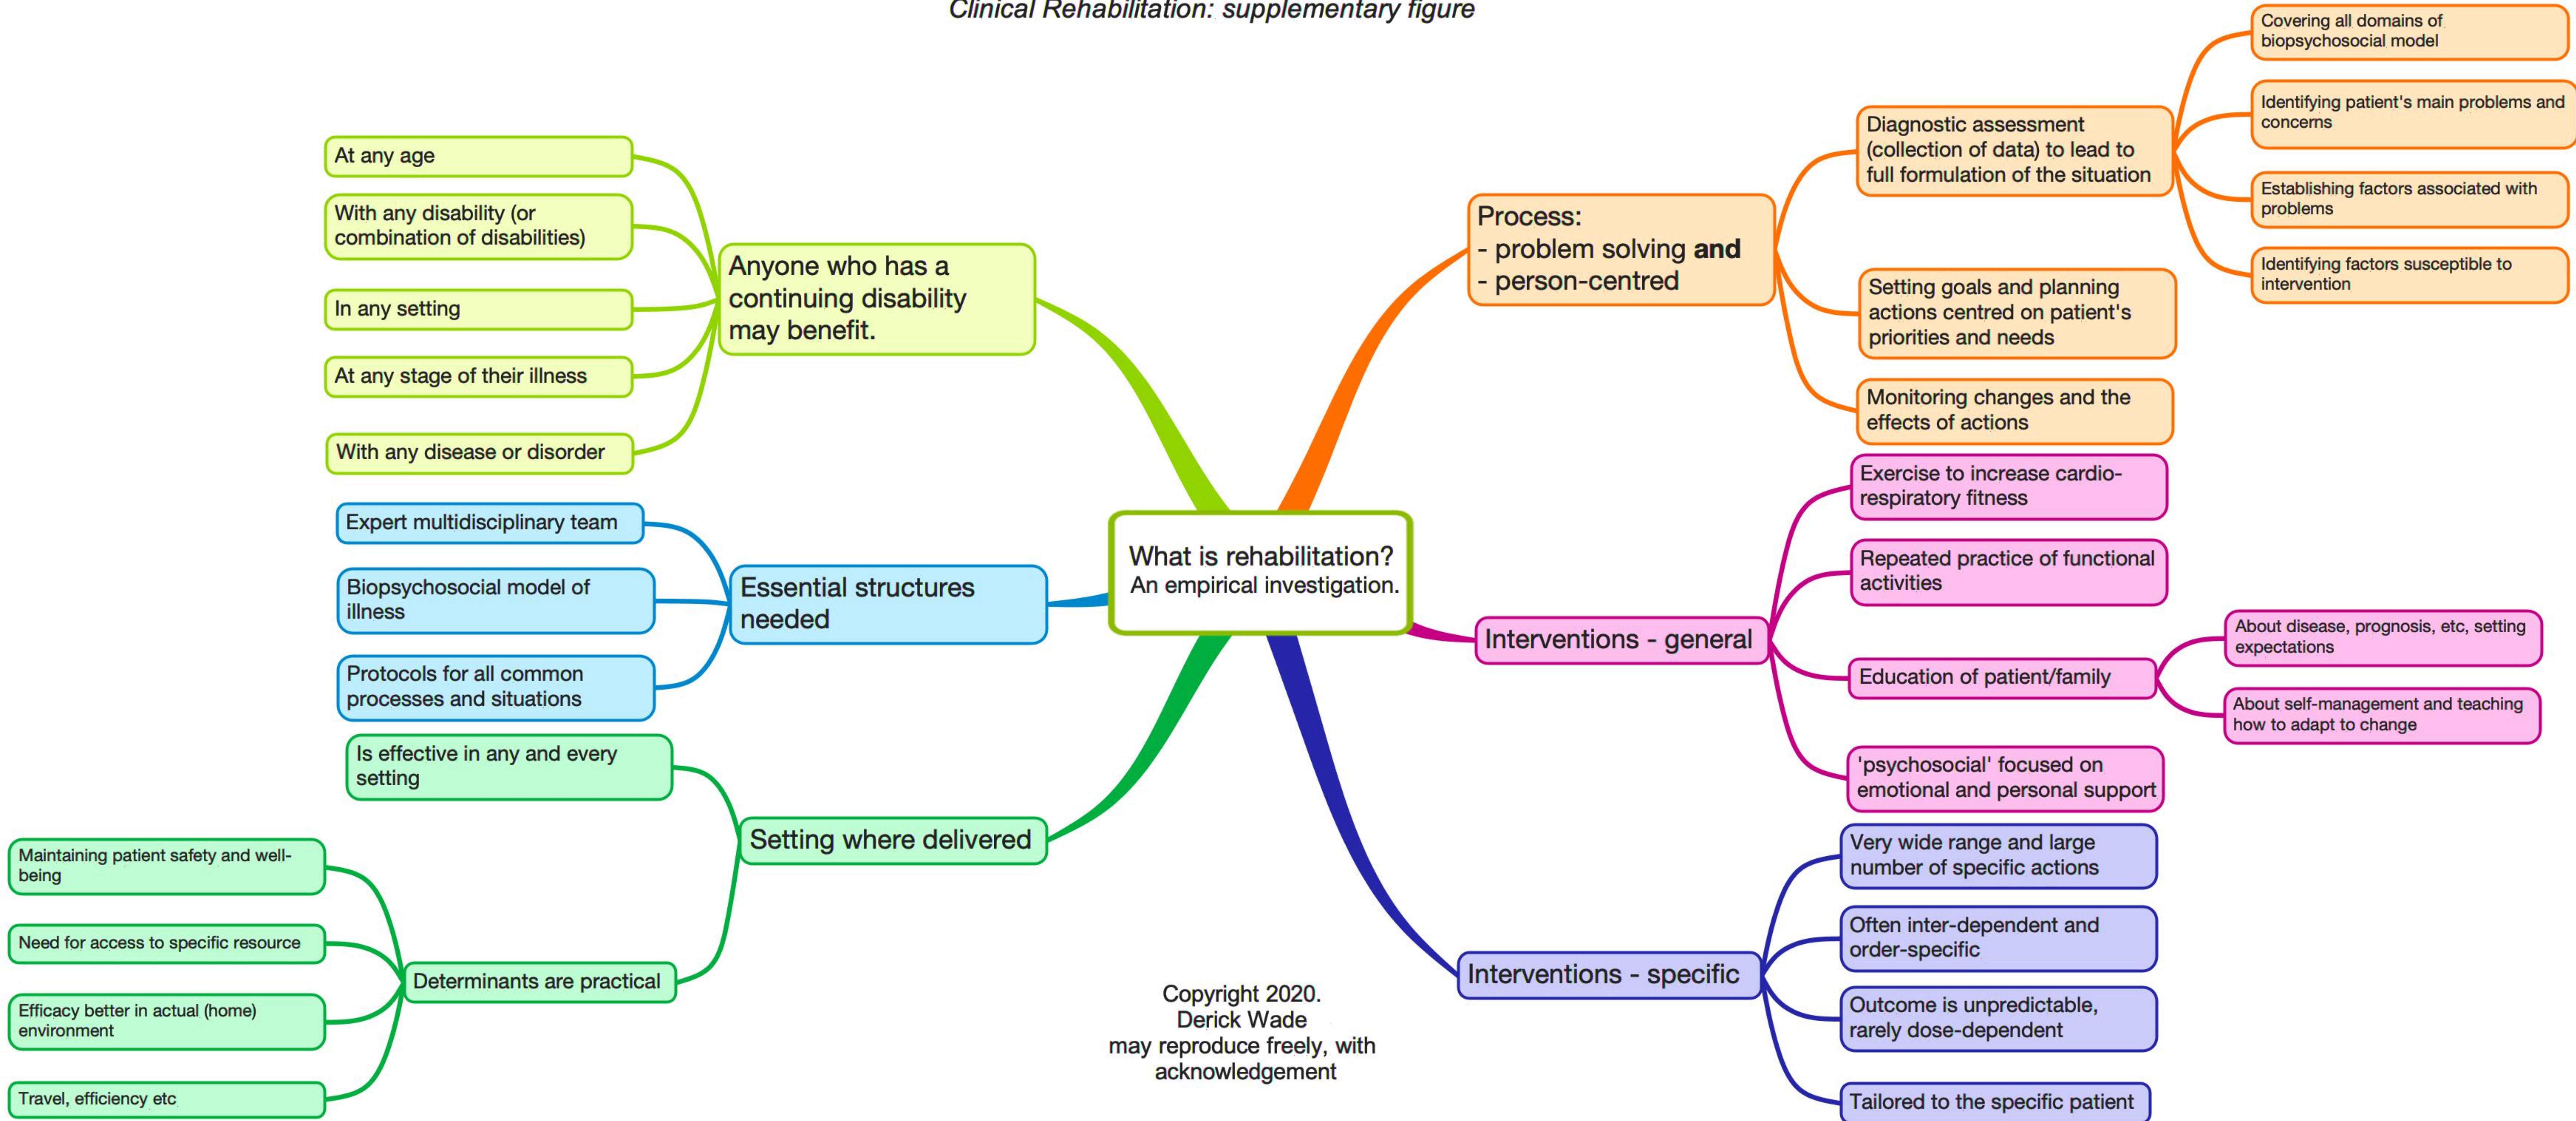

Supplement: 20-01-15_supp_data_figure.pdf [file 20-01-15_supp_data_figure.pdf]
